# Supplementary material for: Drug molecules beyond chemical biology: fluorescence- and DFT-based investigations for fluoride ion sensing and the trace detection of chloroform
Source: Royal Society of Chemistry journal article supplement (doi:10.1039/d4ra04844j), 2024-01-01
Supplement: d4ra04844j1.pdf [file d4ra04844j1.pdf]

## Supporting Information

### **Drug Molecules Beyond Chemical Biology: Fluorescence and DFT-Based Investigation for Fluoride Ion Sensing and Traces Detection of Chloroform**

Sohail Anjum Shahzad<sup>a,\*</sup>, Tayyeba Javid<sup>a</sup>, Mohammed A. Assiri<sup>b,c</sup>, Aqsa Pervaiz<sup>a</sup>, Hasher Irshad<sup>a</sup>, Fu-She Han<sup>d</sup>, Di Demi He<sup>e</sup>

<sup>a</sup> *Department of Chemistry, COMSATS University Islamabad, Abbottabad Campus, University Road, Abbottabad 22060, Pakistan*

<sup>b</sup> *Department of Chemistry, Faculty of Science, King Khalid University, P.O. Box 9004, Abha 61413, Saudi Arabia*

<sup>c</sup> *Central Labs, King Khalid University, AlQura'a, Abha, P.O. Box 960, 61413, Saudi Arabia*

<sup>d</sup> *Changchun Institute of Applied Chemistry, Chinese Academy of Science, 5625 Renming Street, Changchun, Jilin, 200032, China*

<sup>e</sup> *State Key Laboratory of Electroanalytical Chemistry, Changchun Institute of Applied Chemistry, Chinese Academy of Sciences, Changchun, 130022, P. R. China*

**\* Corresponding author:** Sohail Anjum Shahzad, Department of Chemistry, COMSATS University Islamabad, Abbottabad Campus, University Road, Abbottabad 22060, Pakistan.

**E-mail address:** [sashahzad@cuiatd.edu.pk](mailto:sashahzad@cuiatd.edu.pk) (S. A. Shahzad)

## Table of Contents

|                                                                                                                                                                                 |    |
|---------------------------------------------------------------------------------------------------------------------------------------------------------------------------------|----|
| <b>SI-1. Instruments and reagents</b> .....                                                                                                                                     | 3  |
| <b>Figure S1:</b> (a) DLS analysis of sensor <b>ECX</b> before addition of water and (b) after addition of water.....                                                           | 3  |
| <b>Figure S2:</b> Lippert-Mataga plot of sensor <b>ECX</b> in different solvents .....                                                                                          | 4  |
| <b>Figure S3:</b> SV plot of <b>ECX</b> for increasing volume percentage of chloroform.....                                                                                     | 4  |
| <b>Figure S4:</b> (a) DLS analysis of sensor <b>ECX</b> before addition and (b) after addition of $F^-$ .....                                                                   | 5  |
| <b>Figure S5:</b> UV- <i>Vis.</i> absorbance spectrum of <b>ECX-F<sup>-</sup></b> complex .....                                                                                 | 5  |
| <b>Figure S6:</b> Job's plot of sensor <b>ECX-F<sup>-</sup></b> complex in DMF:water (1:4, v/v).....                                                                            | 6  |
| <b>Figure S7:</b> The emission response of sensor <b>ECX</b> towards $F^-$ before and after addition of 100 $\mu$ M of common interferences, cations and single molecules ..... | 6  |
| <b>Figure S8:</b> Effect of pH on the relative enhancement efficiency of sensor <b>ECX</b> towards $F^-$ ...                                                                    | 7  |
| <b>Figure S9:</b> Effect of temperature on the relative enhancement efficiency of sensor <b>ECX</b> towards $F^-$ .....                                                         | 7  |
| <b>Figure S10:</b> Photostability test of sensor <b>ECX</b> and <b>ECX-F<sup>-</sup></b> complex .....                                                                          | 8  |
| <b>Figure S11:</b> Effect of time on relative enhancement efficiency of sensor <b>ECX</b> towards $F^-$ .....                                                                   | 8  |
| <b>Figure S12:</b> <b>ECX-F<sup>-</sup></b> complex interaction sites (a) I and (b) II.....                                                                                     | 9  |
| <b>Figure S13:</b> Changes in relative emission intensity of sensor <b>ECX</b> in the presence of various building materials .....                                              | 9  |
| <b>Figure S14:</b> (a) Detection of $F^-$ in toothpaste and (b) detection of $F^-$ in water .....                                                                               | 10 |
| <b>Table 1</b> Comparison of probe <b>ECX</b> with previously reported sensors.....                                                                                             | 10 |
| <b>Table 2.</b> Spike and recovery experiment for estimation of moisture in raw fly ash and sensing of fluoride in water by sensor <b>ECX</b> .....                             | 11 |
| <b>NMR and Mass spectra</b> .....                                                                                                                                               | 13 |

## SI-1. Instruments and reagents

The fluorescence measurements of sensor **ECX** were executed by spectrofluorometer “Fluoromax-Plus-P-C” Horiba Scientific, USA while sensor **ECX** UV-*Vis.* absorption spectrum was recorded at UV-Vis. spectrophotometer. All chemicals and reagents including *N,N*-dimethylformamide (DMF), ethyl acetate (EtOAc), methanol (MeOH), tetrahydrofuran (THF), dimethyl sulfoxide(DMSO), dichloromethane (DCM), chloroform (CHCl<sub>3</sub>), toluene and acetonitrile (ACN) were purchased from Daejung Chemicals & Metals (Korea), Alfa Aesar (UK), and Sigma Aldrich (USA), and utilized without purification.

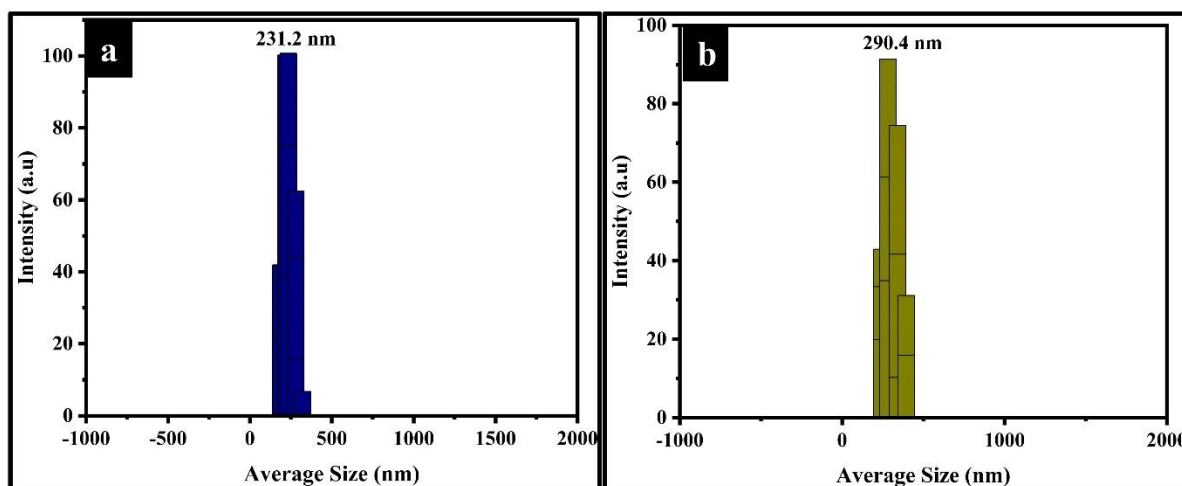

**Figure S1:** (a) DLS analysis of sensor **ECX** before addition of water and (b) after addition of water

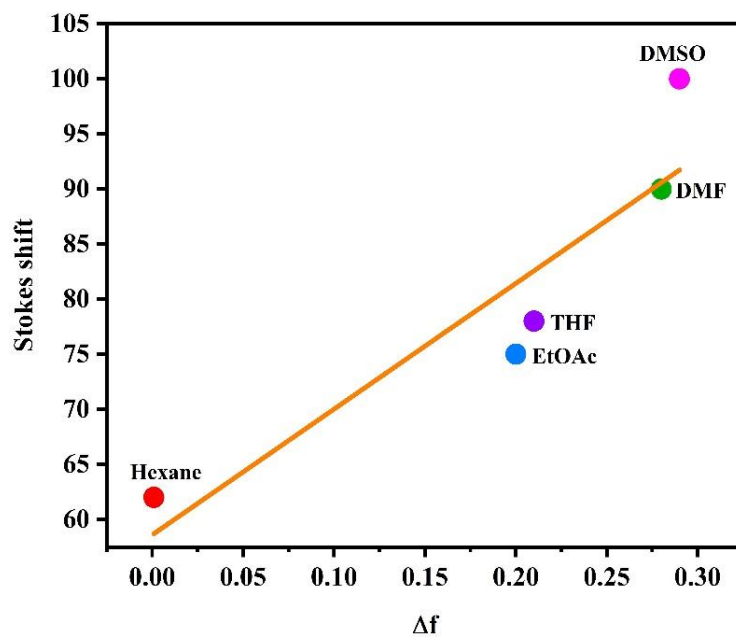

**Figure S2:** Lippert-Mataga plot of sensor **ECX** in different solvents

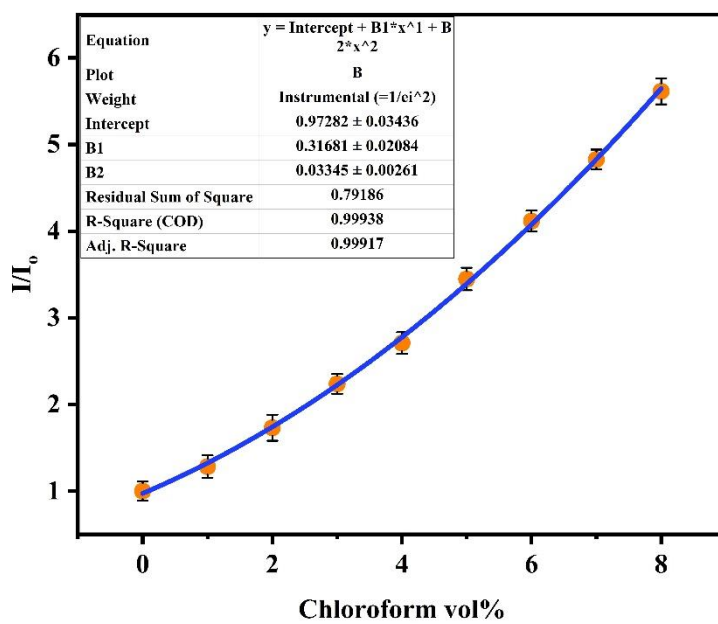

**Figure S3:** SV plot of **ECX** for increasing volume percentage of chloroform

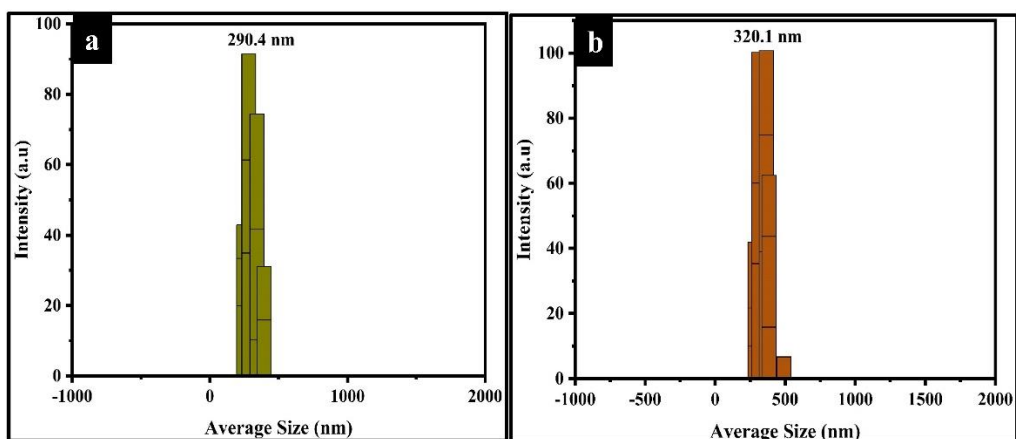

**Figure S4:** (a) DLS analysis of sensor ECX before addition and (b) after addition of  $F^-$

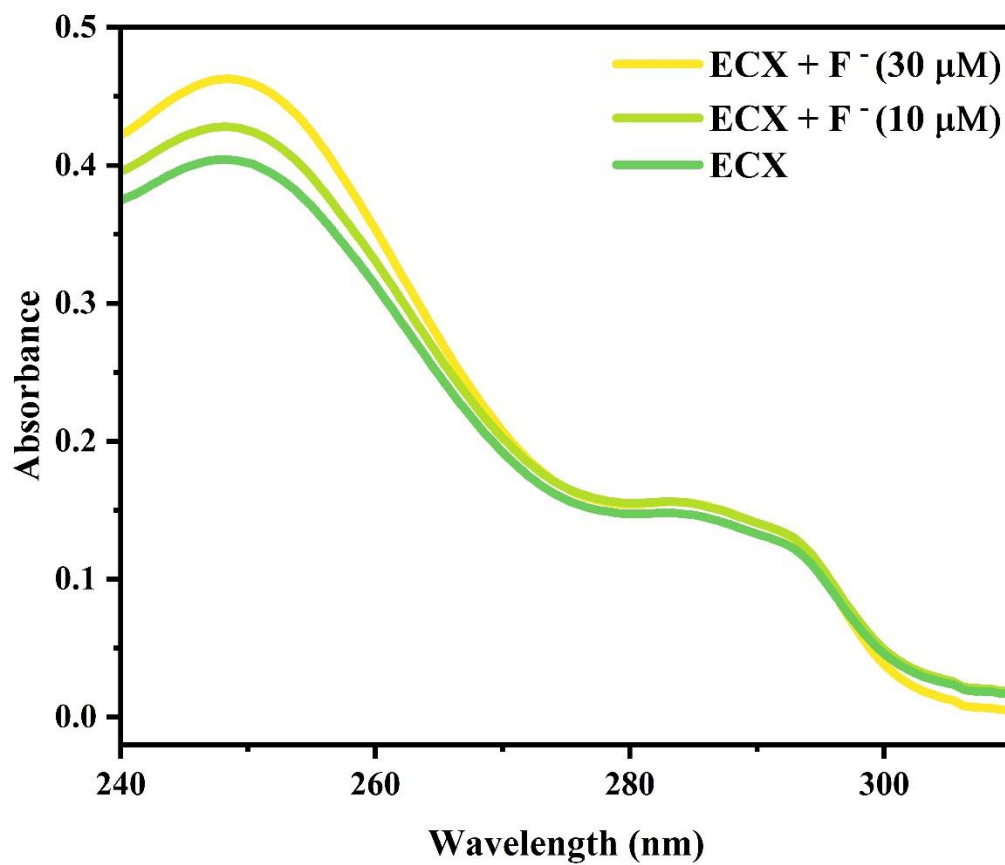

**Figure S5:** UV-Vis. absorbance spectrum of ECX- $F^-$  complex

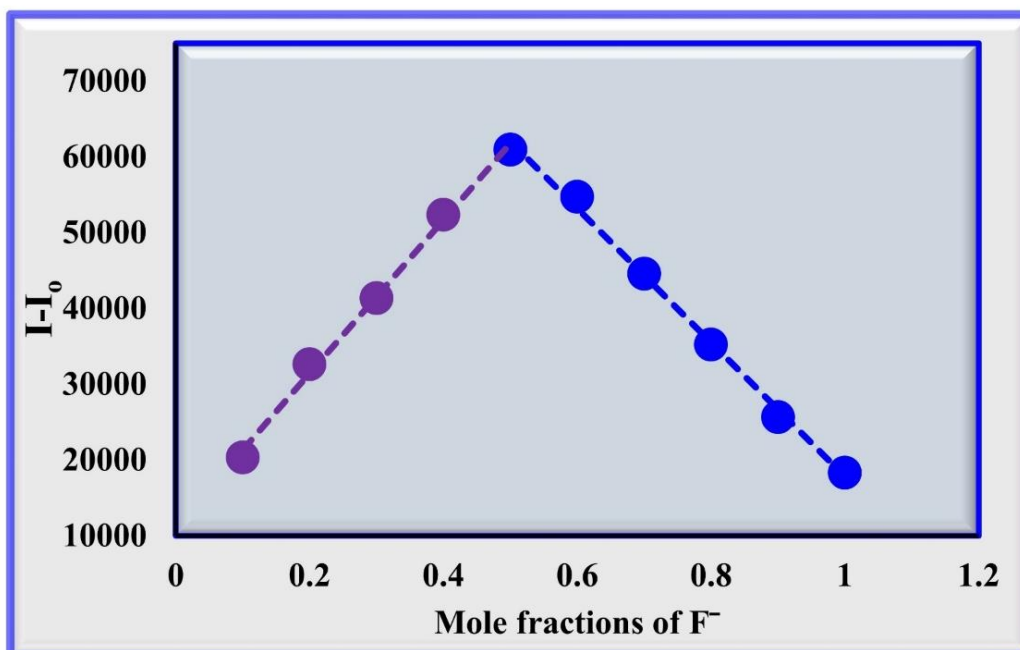

**Figure S6:** Job's plot of sensor **ECX-F<sup>-</sup>** complex in DMF:water (1:4, v/v)

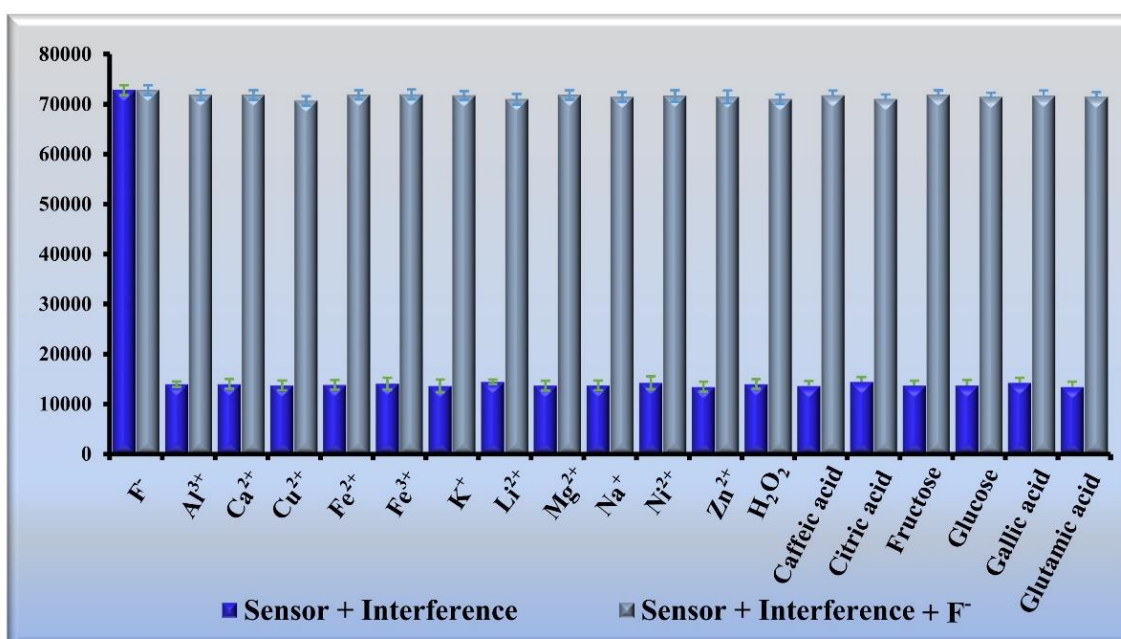

**Figure S7:** The emission response of sensor **ECX** towards F<sup>-</sup> before and after addition of 100 μM of common interferences, cations and single molecules

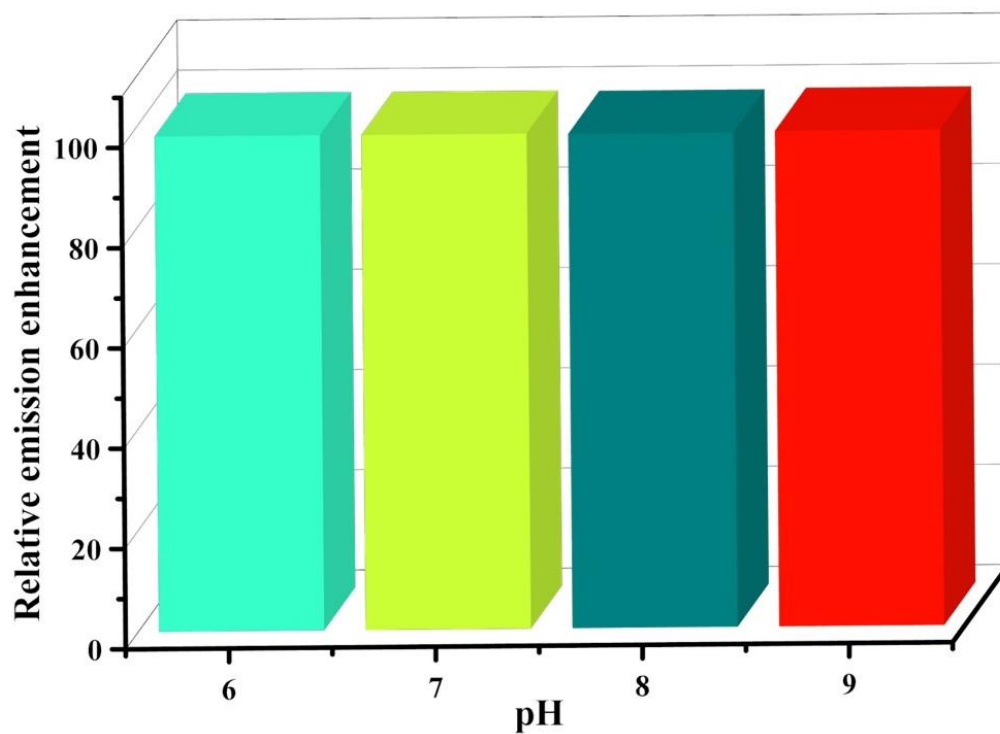

**Figure S8:** Effect of pH on the relative enhancement efficiency of sensor **ECX** towards  $F^-$

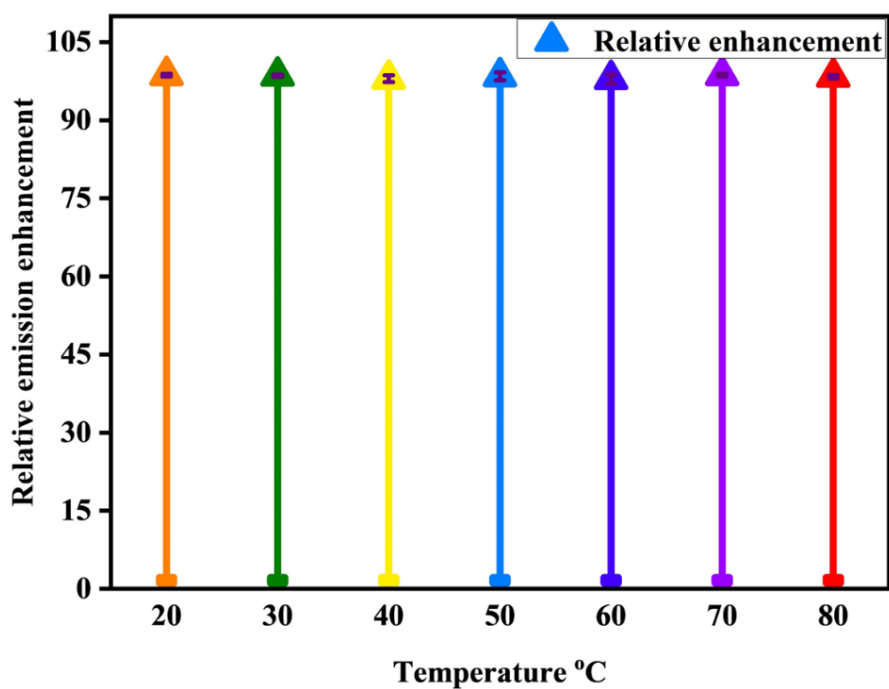

**Figure S9:** Effect of temperature on the relative enhancement efficiency of sensor **ECX** towards  $F^-$

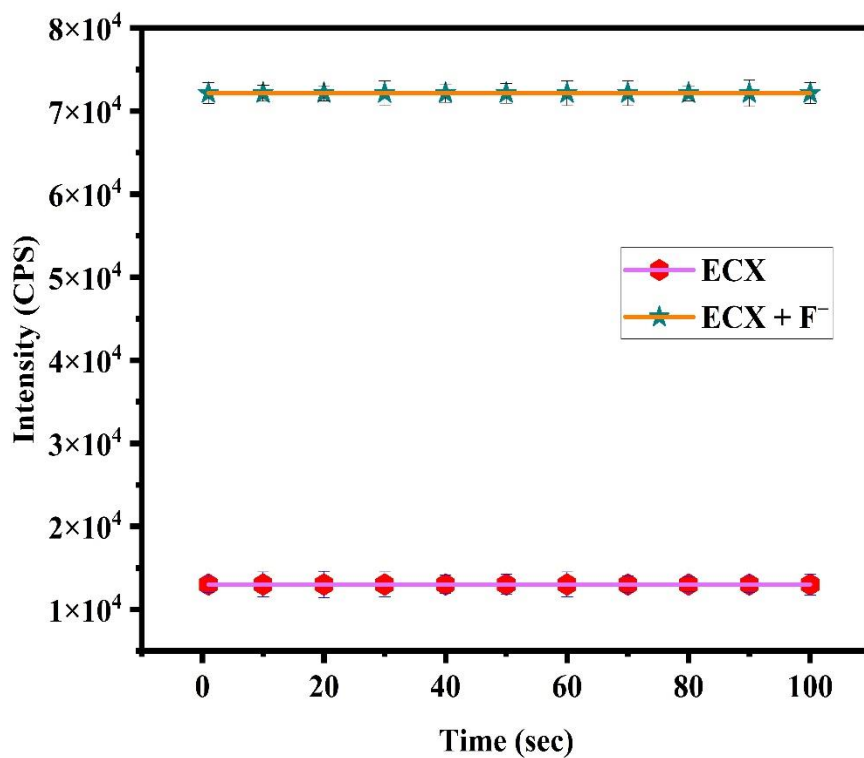

Figure S10: Photostability test of sensor **ECX** and **ECX-F<sup>-</sup>** complex

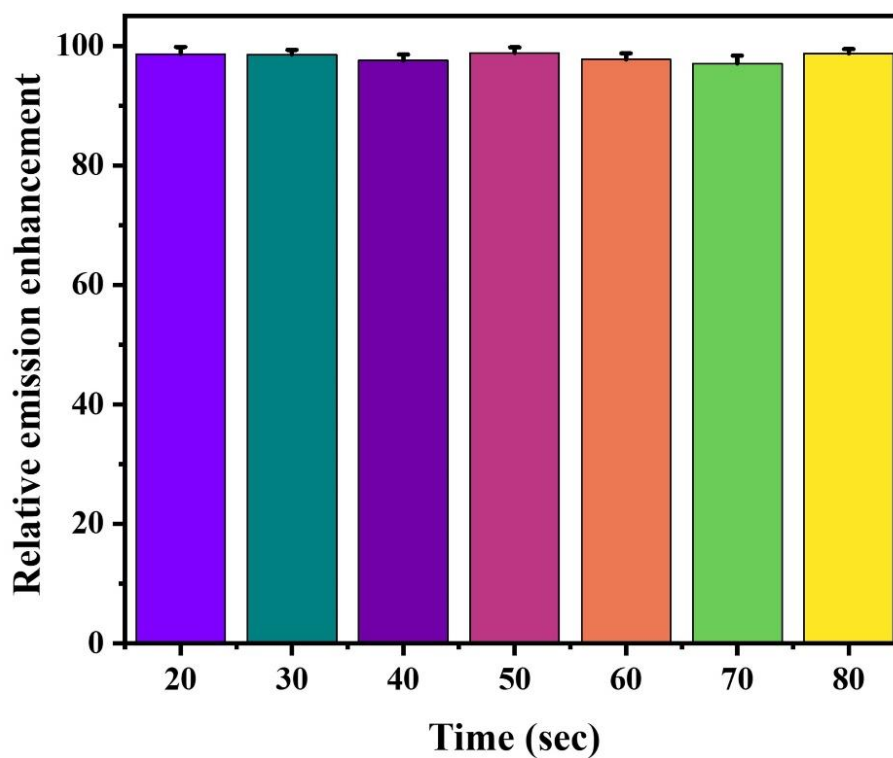

Figure S11: Effect of time on relative enhancement efficiency of sensor **ECX** towards F<sup>-</sup>



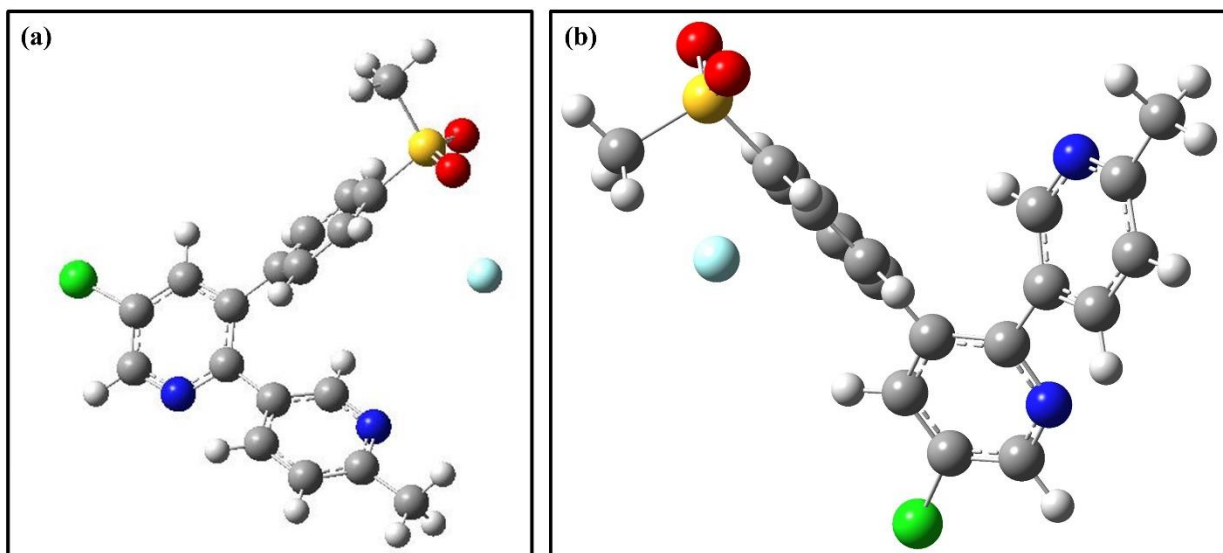

**Figure S12:** ECX-F<sup>-</sup> complex interaction sites (a) I and (b) II

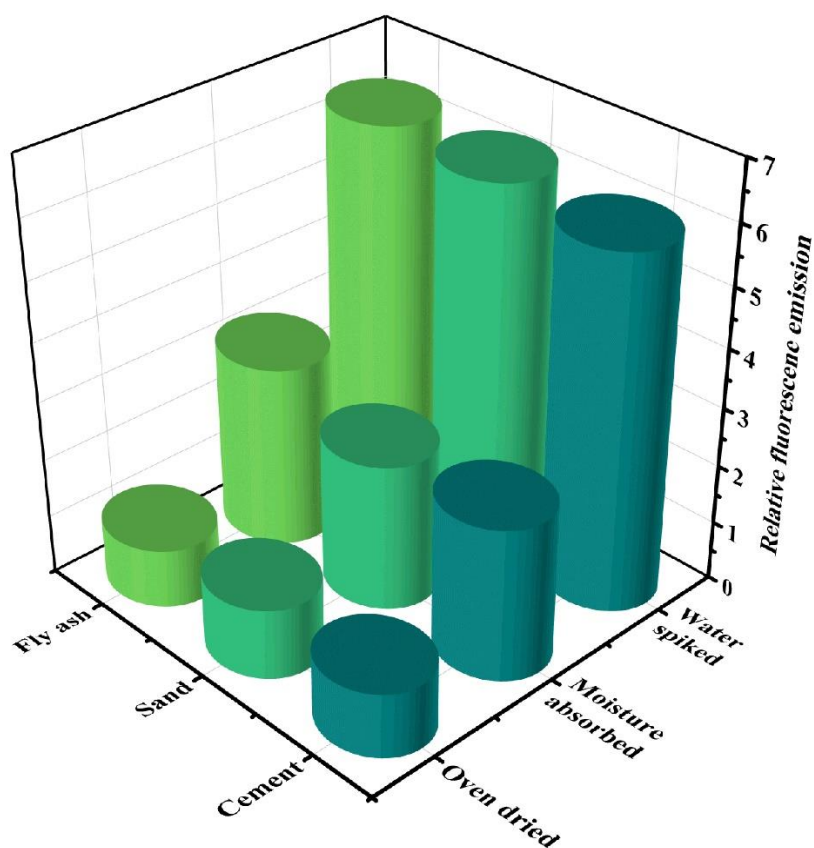

**Figure S13:** Changes in relative emission intensity of sensor ECX in the presence of various building materials

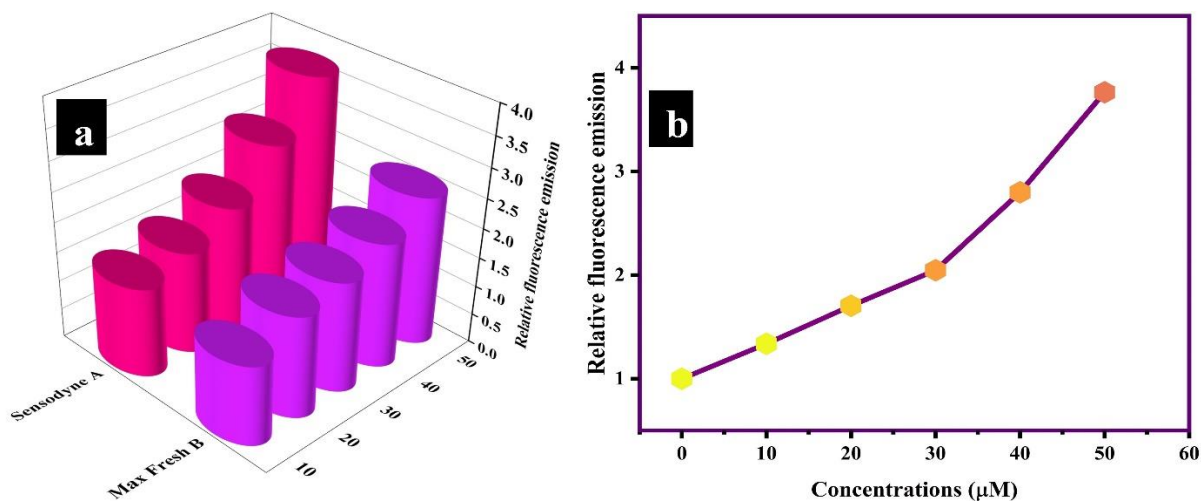

**Figure S14:** (a) Detection of F<sup>-</sup> in toothpaste and (b) detection of F<sup>-</sup> in water

**Table 1** Comparison of probe **ECX** with previously reported sensors

| S.No      | Type of probes                      | Limit of Detection                       | References        |
|-----------|-------------------------------------|------------------------------------------|-------------------|
| 1         | Zr-based coordination polymer       | $1.55 \times 10^{-6} \text{ mol L}^{-1}$ | 1                 |
| 2         | Quinoxaline-based chemosensor       | 3.1 μM                                   | 2                 |
| 3         | Thiosemicarbazone-based chemosensor | $6.3 \times 10^{-7} \text{ M}$           | 3                 |
| 4         | Loutonin-based probe                | $8.62 \times 10^{-7} \text{ M}$          | 4                 |
| 5         | Tetraphenylethylene derived sensor  | $1.66 \times 10^{-7} \text{ M}$          | 5                 |
| 6         | Protonated hemicryptophane capsule  | 570 nM                                   | 6                 |
| 7         | Biphenolic-dansyl derived sensor    | 18 μM                                    | 7                 |
| 8         | Fluorescent carbon dots (CDs)       | 49 μM                                    | 8                 |
| 9         | Curcumin coupled carbon dots        | 0.39 μM                                  | 9                 |
| <b>10</b> | <b>Etoricoxib</b>                   | <b>20 nM</b>                             | <b>This Study</b> |

**Table 2.** Spike and recovery experiment for estimation of moisture in raw fly ash and sensing of fluoride in water by sensor ECX

| Fly Ash                   |              |      | Spiked Fluoride in Water |              |      |
|---------------------------|--------------|------|--------------------------|--------------|------|
| Spiked H <sub>2</sub> O % | Recovery (%) | RSD  | Spiked (μM)              | Recovery (%) | RSD  |
| 0                         | 00           | 00   | 0                        | 00           | 00   |
| 2                         | 97.2         | 1.62 | 10                       | 99.5         | 1.54 |
| 4                         | 96.9         | 1.80 | 20                       | 99.3         | 1.43 |
| 6                         | 97.5         | 1.36 | 30                       | 98.8         | 1.78 |
| 8                         | 97.1         | 1.23 | 40                       | 99.2         | 1.34 |
| 10                        | 96.9         | 1.36 | 50                       | 99.1         | 1.48 |

## References

1. L. Wang, X. Liu, Y. Zhu, J. Zhang and L. Zhu, *Polym. Bull.* 2024, **81**, 335-350.
2. G. A. Zalmi, S. E. Jadhav, H. A. Mirgane, B. R. Madje and S. V. Bhosale, *ChemistrySelect.* 2023, **8**, e202203380.
3. L. Yang, M. Li, S. Ruan, X. Xu, Z. Wang and S. Wang, *Spectrochim. Acta A Mol. Biomol. Spectrosc.* 2021, **255**, 119718.
4. D. Mohanasundaram, G. G. V. Kumar, S. K. Kumar, B. Maddiboyina, R. P. Raja, J. Rajesh and G. Sivaraman, *J. Mol. Liq.* 2020, **317**, 113913.
5. Y.-T. Zeng, S.-Y. Gao, K. Traskovskis, B. Gao and X.-K. Ren, *Dyes Pigments*, 2021, **193**, 109491.
6. Y. Lin, K. Du, M. R. Gau and I. J. Dmochowski, *Chem. Sci.* 2023, **14**, 291-297.
7. S. Mongkolkaew, A. Songsasen, W. Sirisaksoontorn and B. Wannalarse, *Supramol. Chem.* 2021, **33**, 151-159.
8. S. Liu, Z. Liu, Q. Li, H. Xia, W. Yang, R. Wang, Y. Li, H. Zhao and B. Tian, *Spectrochim. Acta A Mol. Biomol. Spectrosc.* 2021, **246**, 118964.
9. X. Zhang, X. Tan and Y. Hu, *J. Hazard. Mater.* 2021, **411**, 125184.

## Complete reference for Gaussian 09

Gaussian 09, Revision D.01, M. J. Frisch, G. W. Trucks, H. B. Schlegel, G. E. Scuseria, M. A. Robb, J. R. Cheeseman, G. Scalmani, V. Barone, B. Mennucci, G. A. Petersson, H. Nakatsuji, M. Caricato, X. Li, H. P. Hratchian, A. F. Izmaylov, J. Bloino, G. Zheng, J. L. Sonnenberg, M. Hada, M. Ehara, K. Toyota, R. Fukuda, J. Hasegawa, M. Ishida, T. Nakajima, Y. Honda, O. Kitao, H. Nakai, T. Vreven, J. A. Montgomery, Jr., J. E. Peralta, F. Ogliaro, M. Bearpark, J. J. Heyd, E. Brothers, K. N. Kudin, V. N. Staroverov, T. Keith, R. Kobayashi, J. Normand, K. Raghavachari, A. Rendell, J. C. Burant, S. S. Iyengar, J. Tomasi, M. Cossi, N. Rega, J. M. Millam, M. Klene, J. E. Knox, J. B. Cross, V. Bakken, C. Adamo, J. Jaramillo, R. Gomperts, R. E. Stratmann, O. Yazyev, A. J. Austin, R. Cammi, C. Pomelli, J. W. Ochterski, R. L. Martin, K. Morokuma, V. G. Zakrzewski, G. A. Voth, P. Salvador, J. J. Dannenberg, S. Dapprich, A. D. Daniels, O. Farkas, J. B. Foresman, J. V. Ortiz, J. Cioslowski, and D. J. Fox, Gaussian, Inc., Wallingford CT, 2013.
